# Supplementary material for: N–PtIV–H/N–H⋯PtII intramolecular redox equilibrium in a product of H–C(sp2) cleavage and unusual alkane/arene C–H bond selectivity of ([2.1.1]pyridinophane)PtII(CH3)+Electronic supplementary information (ESI) available: experimental details. See http://www.rsc.org/suppdata/cc/b2/b207797n/
Source: Royal Society of Chemistry journal article supplement (doi:10.1039/b207797n), 2003-01-03
Supplement: b207797n.doc [file b207797n.doc]

**Supplementary data**

**N  PtIV-H/N-H…PtII Intramolecular Redox Equilibrium in a Product of H-C(sp2) Cleavage and Unusual Alkane/Arene C-H Bond Selectivity of Transient (2.1.1-pyridinophane)PtII**

**Andrei N. Vedernikov* and Kenneth G. Caulton***

*Department of Chemistry, Indiana University, Bloomington, Indiana 47405*

**Experimental details:**

**General.** All manipulations were carried out under purified argon using standard Schlenk and glovebox techniques. Solvents were dried and distilled following standard protocols and stored in gas-tight bulbs under argon. All reagents for which a synthesis is not given are commercially available from Aldrich or Pressure Chemicals and were used as received without further purification. All NMR solvents were dried, vacuum-transferred and stored in an argon-filled glovebox. [2.1.1]-(2,6)-pyridinophane,1 [PtMe2(L)] 1 and diphenylbis(dimethylsulphide)platinum(II),2 have been synthesized according to the published procedure. 1H and 13C NMR spectra were recorded on Inova 700 spectrometer (1H 400 MHz; 13C 100.62 MHz). 1H and 13C NMR chemical shifts are reported in ppm and referenced to residual solvent resonance peaks.

**Computational details.** Theoretical calculations in this work have been performed using density functional theory (DFT) method,3 specifically functional PBE,4 implemented in an original program package “Priroda”.5In PBE calculations relativistic Stevens-Bash-Krauss (SBK) effective core potentials (ECP) 6optimized for DFT-calculations have been used. Basis set was 311-split for main group elements with one additional polarization p-function for hydrogen, additional two polarization d-functions for elements of higher periods. Full geometry optimization has been performed without constraints on symmetry. For all species under investigation frequency analysis has been carried out. All minima have been checked for the absence of imaginary frequencies.

**DFT-calculated structure of LPtMe+**.

Along with structure mentioned in the main text, we have found two more minima on the corresponding potential energy surface,

one for an isomeric (2-L)PtMe+ characterized with *cis*-orientation of Me and the longest of the bridges connecting pyridine residues:

with relative stability, Go298, of + 0.5 kcal/mol,

and another minimum for (3-L)PtMe+ :

with relative stability, Go298, of + 3.2 kcal/mol.

Further study of the reaction path of methane elimination from [LPtMe2H]+ will allow to determine which of them is on the reaction coordinate.

Gibbs energy of formation of a methane adduct, (L)PtMe(CH4)+, Go298,

was calculated to be 2 kcal/mol (all hydrogens are omitted from the drawing with exception those of methane). Selected distances, Å: Pt-N(25), 3.218; Pt-H(43), 1.819; Pt-H(44), 2.322.

**Preparation of [PtPh2(L)], C31H27N3Pt**. In a glovebox filled with purified argon a dry flask containing magnetic stirring bar was charged with PtPh2(SMe2)2 (44.3 mg, 100  mol) dissolved in 2.0 ml of tetrahydrofuran and with [2,1,1]-(2,6)-pyridinophane (28.8 mg, 100  mol) dissolved in 0.5 ml of tetrahydrofuran. The mixture was left to stay overnight. The solvent was removed in vacuum. White crystals were washed with several drops of tetrahydrofuran and dried. Yield 63 mg (99 %).

1H NMR – fluxional at r.t.; (‑40oC, CD2Cl2):

2.53 (m, 1H, C2H4), 2.94 (m, 1H, C2H4), 3.47 (m, 1H, C2H4), 3.69 (d, 2*J*H‑H = 11.9 Hz, 1H, CH2), 4.38 (d, 2*J*H‑H = 13.3 Hz, 1H, CH2), 5.31 (m, 1H, C2H4), 5.37 (d, 2*J*H‑H = 11.8 Hz, 1H, C2H4), 6.40 (d, 2*J*H‑H = 13.2 Hz, 1H, CH2), 6.64 (m, 2H, *para*-CH, Ph), 6.74 (m, 4H, *meta*-CH, Ph), 6.84 (d, 3*J*H-H = 7.8 Hz, 1H, *meta*-CH, py), 6.87 (d, 3*J*H-H = 7.8 Hz, 1H, *meta*-CH, py), 7.15 (d, 3*J*H-H = 7.8 Hz, 2H, *meta*-CH, py), 7.24 (d, 3*J*H-H = 7.8 Hz, 1H, *meta*-CH, py), 7.34 (t, 3*J*H-H = 7.8 Hz, 1H, *para*-CH, py), 7.36 (d, 3*J*H-H = 7.8 Hz, 1H, *meta*-CH, py), 7.39 (m, 4H, *ortho*-CH, Ph), 7.56 (t, 3*J*H-H = 7.8 Hz, 1H, *para*-CH, py), 7.60 (t, 3*J*H-H = 7.8 Hz, 1H, *para*-CH, py).

**Preparation of [PtMe2H(L)]BArF4, tautomeric mixture of [PtPh2H(L)]BArF4 and [PtPh2(H‑L)]BArF4 and their reactions with CH bond donors.** A 10 ml Schlenk flask equipped with a Kontes Teflon valve and magnetic stirbar was charged in an argon filled glovebox with 20 mg of NaBArF4 (22  mol), 10.3 mg of PtMe2(L) or 12.8 mg of PtPh2(L) (20  mol), 0.6-0.3 ml of CD2Cl2 and equal volume of particular liquid hydrocarbon (benzene, cyclopentane). The flask was then removed from the glovebox and immersed into an acetone bath cooled till -60oC. The Teflon valve was replaced for a serum cap and solution of 3.0 mg of HSO3CF3 in 0.1 ml of CD2Cl2 (20  mol) was added to the stirred suspension dropwise with a syringe. After 5 min. of stirring at ‑60oC the flask was removed from a bath. The reaction mixture was transferred into the glovebox and filtered into a Teflon-capped NMR tube. Then in the case of gaseous substrates to be reacted with PtR2H(L)BArF4 (ethane) the liquid inside the NMR tube was frozen with liquid nitrogen, argon evacuated and 50-75 ml of gaseous alkane were condensed. The tube was cautiously warmed up. Reactions were monitored by 1H NMR and spectra were taken in certain period of time.

Yield of products was determined in general by NMR integration versus BArf4 which is stable under reaction conditions.

**[PtMe2H(L)]BArF4**

1H NMR (CD2Cl2, 20oC):

‑20.65 (s, 1*J*Pt-H = 1354 Hz, 1H, PtH), 1.27 (s, 2*J*Pt-H = 70 Hz, 6H, PtCH3), 3.49-3.55 (m, 2H, C2H4), 3.72-3.82 (m, 2H, C2H4), 4.06 (d, 2*J*H-H = 15.5 Hz, 2H, CH2), 5.00 (d, 2*J*H-H = 15.5 Hz, 2H, CH2), 7.26 (d, 3*J*H-H = 7.8 Hz, 2H, *meta*-CH, py), 7.31 (d, 3*J*H-H = 7.8 Hz, 2H, *meta*-CH, py), 7.47 (d, 3*J*H-H = 7.8 Hz, 2H, *meta*-CH, py), 7.50-7.53 (br s, 4H, *para*-CH, ArF), 7.61 (t, 3*J*H-H = 7.8 Hz, 2H, *para*-CH, py), 7.68-7.83 (br s, 8H, *meta*-CH, ArF), 7.82 (t, 3*J*H-H = 7.8 Hz, 1H, *para*-CH, py)

13C NMR (CD2Cl2, ‑40oC):

‑18.61 (s, 1*J*Pt-C = 602 Hz, PtC), 36.94 (s, 3*J*Pt-C = 30 Hz, C2H4), 46.37 (s, 3*J*Pt-C = 17 Hz, CH2), 117.74 (m, *para*-C, BArF4), 124.70 (quart, 1*J*C‑F = 272.7 Hz, CF3, BArF4), 125.21 (*meta*-C, py), 126.63 (*meta*-C, py), 128.88 (quart, 2*J*C-F = 31.7 Hz, *meta*-C, BArF4), 134.89 (br s, *ortho*-C, BArF4), 140.19, 141.17 (*para*-C, py), 154.64, 156.68, 160.38 (*ortho*-C, py), 161.92 (quart, 1*J*B-C = 50 Hz, B-C, BArF4)

**Reaction of [PtMe2H(L)]BArF4 with benzene and benzene-d6.**  In 30 min. of reaction 6% of (L)PtPh(Me)H+ (vs BArf4) was detected, 1H NMR (CD2Cl2, 20oC): 1.50 (JPtH = 68 Hz, 3H, Pt-Me), -19.42 (JPtH = 1370, 1H, Pt-H). In 4 h it is completely gone. Signals of (L)PtPh2H+ and (LH)PtPh2+ became visible in 90 min of reaction. In the case of benzene-d6 in 8 h of reaction we observed formation of a mixture of isotopomeric methanes, 0.73 (s, CH4), 0.72 (t, 2*J*D-H = 1.9 Hz, CDH3), 0.70 (quint, 2*J*D-H = 1.8 Hz, CD2H2), 0.69 (hept, 2*J*D-H = 1.9 Hz, CD3H) in 1: 0.6 : 0.4:0.4 mol ratio (NMR integration).

**[PtPh2H(L)]BArF4**

1H NMR data (CD2Cl2, 20oC):

18.43 (s, 1*J*Pt-H = 1350 Hz, 1H, PtH), 3.78 (d, 2*J*H-H = 15.6 Hz, 2H, CH2), 3.80 (m, 2H, C2H4), 4.21 (m, 2H, C2H4), 4.57 (d, 2*J*H-H = 15.6 Hz, 2H, CH2), 6.84 (m, 2H, *para*-CH, Ph), 7.01 (m, 4H, *meta*-CH, Ph), 7.12 (d, 2*J*H-H = 7.8 Hz, 2H, *meta*-CH, py), 7.41 (d, 2*J*H-H = 7.8 Hz, 2H, *meta*-CH, py), 7.52 (d, 2*J*H-H = 7.8 Hz, 2H, *meta*-CH, py), 7.53 (br s, 4H, *para*-CH, ArF), 7.61 (t, 3*J*H-H = 7.8 Hz, 2H, *para*-CH, py), 7.75 (br s, 8H, *meta*-CH, ArF), 7.94 (t, 3*J*H-H = 7.8 Hz, 1H, *para*-CH, py); signals of *ortho*-CH, Ph are presumably overlapping with signal of *meta*-CH, ArF.

13C NMR (CD2Cl2, 20oC):

36.60 (C2H4), 47.16 (CH2), 117.66 (m, *para*-C, BArF4), 124.71 (quart, 1*J*C‑F = 272.7 Hz, CF3, BArF4), 124.73 (*meta*-C, py), 125.23 (*para*-C, Ph), 125.56, 126.98 (*meta*-C, py), 128.69 (*meta*-C, Ph), 129.04 (quart, 2*J*C-F = 31.7 Hz, *meta*-C, BArF4), 134.94 (br s, *ortho*-C, BArF4), 135.72 (s, 2*J*Pt‑C = 34 Hz, *ortho*-C, Ph), 140.91, 141.84 (*para*-C, py), 155.65, 157.36 (*ortho*-C, py), 161.90 (quart, 1*J*B-C = 50 Hz, B-C, BArF4), 161.91 (*ortho*-C, py)

C-Pt signal in the mixtures investigated is too weak and probably overlapping with other signals.

**[PtPh2(H-L)]BArF4**

1H NMR (CD2Cl2, 20oC):

2.92 (ddd, 2*J*H-H = 15.5 Hz, 3*J*H-H = 5.5 Hz, 3*J*H-H = 3.2 Hz, 1H, C2H4), 3.36 (ddd, 2*J*H-H = 19.8 Hz, 3*J*H-H = 13.8 Hz, 3*J*H-H = 3.2 Hz, 1H, C2H4), 3.83 (d, 2*J*H-H = 13.7 Hz, 1H, CH2), 3.90 (ddd, 2*J*H-H = 19.8 Hz, 3*J*H-H = 5.5 Hz, 3*J*H-H = 2.6 Hz, 1H, C2H4), 4.57 (d, 2*J*H-H = 14.7 Hz, 1H, CH2), 5.22 (ddd, 2*J*H-H = 19.8 Hz, 3*J*H-H = 13.8 Hz, 3*J*H-H = 2.6 Hz, 1H, C2H4), 5.88 (d, 2*J*H-H = 14.7 Hz, 1H, CH2), 5.92 (d, 2*J*H-H = 13.7 Hz, 1H, CH2), 6.81 (m, 1H, *para*-CH, Ph), 6.83 (m, 1H, *para*-CH, Ph), 6.91 (m, 4H, *meta*-CH, Ph), 7.29 (d, 3*J*H-H = 7.8 Hz, 1H, *meta*-CH, py), 7.32 (d, 3*J*H-H = 7.8 Hz, 1H, *meta*-CH, py), 7.36 (dd, 3*J*H-H = 8.0 Hz, 4*J*H-H = 1.2 Hz, 2H, *ortho*-CH, Ph), 7.38 (dd, 3*J*H-H = 8.0 Hz, 4*J*H-H = 1.2 Hz, 2H, *ortho*-CH, Ph), 7.44 (d, 3*J*H-H = 7.8 Hz, 2H, *meta*-CH, py), 7.48 (d, 3*J*H-H = 7.8 Hz, 1H, *meta*-CH, py), 7.50-7.53 (br s, 4H, *para*-CH, ArF), 7.60 (d, 3*J*H-H = 7.8 Hz, 1H, *meta*-CH, py), 7.68-7.83 (br s, 8H, *meta*-CH, ArF), 7.75 (t, 3*J*H-H = 7.8 Hz, 1H, *para*-CH, py), 7.78 (t, 3*J*H-H = 7.8 Hz, 1H, *para*-CH, py), 8.03 (t, 3*J*H-H = 7.8 Hz, 1H, *para*-CH, py), 17.33 (s, 1*J*Pt-H = 86 Hz, 1H, PtHN)

13C NMR (CD2Cl2, 20oC):

31.15, 35.43 (C2H4), 41.65 (CH2), 47.27 (s, 3*J*Pt‑C = 44 Hz, CH2), 117.66 (m, *para*-C, BArF4), 119.53 (s, 1*J*Pt‑C = 790 Hz, Pt‑C), 124.71 (quart, 1*J*C‑F = 272.7 Hz, CF3, BArF4), 123.46, 124.73 (*meta*-C, py), 125.23 (2C, *meta*-C, py), 125.23 (*para*-C, Ph), 125.38 (*para*-C, Ph’), 125.72, 126.80 (*meta*-C, py), 127.45 (*meta*-C, Ph), 127.76 (*meta*-C, Ph’), 129.04 (quart, 2*J*C-F = 31.7 Hz, *meta*-C, BArF4), 134.94 (br s, *ortho*-C, BArF4), 136.77 (s, 2*J*Pt‑C = 28 Hz, *ortho*-C, Ph), 136.80 (s, 2*J*Pt‑C = 28 Hz, *ortho*-C, Ph’), 140.18, 141.84, 146.62 (*para*-C, py), 152.08, 154.79, 155.43, 156.30, 157.29, 161.54 (*ortho*-C, py), 161.90 (quart, 1*J*B-C = 50 Hz, B-C, BArF4)

**[PtH(2-C2H4)(L)]BArF4**

1H NMR (CD2Cl2, ‑40oC):

‑27.49 (s, 1*J*Pt-H = 1093 Hz, 1H, PtH), 2.45-2.83 (m, 2*J*Pt-H = 72 Hz, 4H, CH2=CH2), 3.44-3.58 (m, 2H, C2H4), 3.76-3.88 (m, 1H, C2H4), 3.98 (d, 2*J*H-H = 14.0 Hz, 1H, CH2), 4.32 (d, 2*J*H-H = 14.0 Hz, 1H, CH2), 4.34 (d, 2*J*H-H = 14.0 Hz, 1H, CH2), 4.92 (d, 2*J*H-H = 14.0 Hz, 1H, CH2), 4.82-4.95 (m, 1H, C2H4), 7.06 (d, 3*J*H-H = 7.8 Hz, 1H, *meta*-CH, py), 7.32 (d, 3*J*H-H = 7.8 Hz, 1H, *meta*-CH, py), 7.42 (d, 3*J*H-H = 7.8 Hz, 2H, *meta*-CH, py), 7.51 (d, 3*J*H-H = 7.8 Hz, 1H, *meta*-CH, py), 7.55 (d, 3*J*H-H = 7.8 Hz, 1H, *meta*-CH, py), 7.50-7.53 (br s, 4H, *para*-CH, ArF), 7.53 (t, 3*J*H-H = 7.8 Hz, 1H, *para*-CH, py), 7.68-7.83 (br s, 8H, *meta*-CH, ArF), 7.69 (t, 3*J*H-H = 7.8 Hz, 1H, *para*-CH, py), 7.80 (t, 3*J*H-H = 7.8 Hz, 1H, *para*-CH, py)

13C NMR (CD2Cl2, ‑40oC):

22.00 (s, 2*J*Pt-C = 325 Hz, CH2=CH2), 35.47 (s, 3*J*Pt-C = 12 Hz, *C*H2CH2), 36.98 (s, 3*J*Pt-C = 15 Hz, CH2*C*H2), 49.43 (s, 3*J*Pt-C = 52 Hz, CH2), 50.42 (s, 3*J*Pt-C = 37 Hz, CH2), 117.74 (m, *para*-C, BArF4), 123.22, 123.50, 123.99 (*meta*-C, py), 124.70 (quart, 1*J*C‑F = 272.7 Hz, CF3, BArF4), 125.44 (*meta*-C, py), 127.15 (*meta*-C, py), 128.88 (quart, 2*J*C-F = 31.7 Hz, *meta*-C, BArF4), 134.89 (br s, *ortho*-C, BArF4), 139.58, 139.96, 140.74 (*para*-C, py), 154.50, 155.35, 156.27, 156.82, 160.36, 161.72 (*ortho*-C, py), 161.92 (quart, 1*J*B-C = 50 Hz, B-C, BArF4)

**[PtH(2-C5H8)(L)]BArF4**

1H NMR (CD2Cl2, ‑30oC):

‑26.97 (s, 1*J*Pt-H = 1171 Hz, 1H, PtH), 1.10-1.24 (m, 1H, CH2), 1.42-1.61 (m, 2H, CH2), 1.61-1.73 (m, 1H, CH2), 1.73-2.02 (m, 2H, CH2), 3.04 (m, 2*J*Pt-H = 88 Hz, 1H, -CH=), 3.44-3.53 (m, 2H, C2H4), 3.56 (m, 2*J*Pt-H = 80 Hz, -CH=), 3.82-3.94 (m, 1H, C2H4), 4.04 (d, 2*J*H-H = 13.4 Hz, 1H, CH2), 4.28 (d, 2*J*H-H = 13.4 Hz, 1H, CH2), 4.32 (d, 2*J*H-H = 14.0 Hz, 1H, CH2), 4.93-5.03 (m, 1H, C2H4), 5.09 (d, 2*J*H-H = 14.0 Hz, 1H, CH2), 7.07 (d, 3*J*H-H = 7.8 Hz, 1H, *meta*-CH, py), 7.32 (d, 3*J*H-H = 7.8 Hz, 1H, *meta*-CH, py), 7.37 (d, 3*J*H-H = 7.8 Hz, 1H, *meta*-CH, py), 7.39 (d, 3*J*H-H = 7.8 Hz, 1H, *meta*-CH, py), 7.47 (d, 3*J*H-H = 7.8 Hz, 1H, *meta*-CH, py), 7.51 (d, 3*J*H-H = 7.8 Hz, 1H, *meta*-CH, py), 7.50-7.53 (br s, 4H, *para*-CH, ArF), 7.53 (t, 3*J*H-H = 7.8 Hz, 1H, *para*-CH, py), 7.67 (t, 3*J*H-H = 7.8 Hz, 1H, *para*-CH, py), 7.68-7.83 (br s, 8H, *meta*-CH, ArF), 7.77 (t, 3*J*H-H = 7.8 Hz, 1H, *para*-CH, py)

13C NMR (CD2Cl2, ‑30oC):

21.72 (s, 3*J*Pt-C = 38 Hz, CH2*C*H2CH2), 32.10 (s, 2*J*Pt-C = 16 Hz, *C*H2CH=), 32.44 (s, 2*J*Pt-C = 18 Hz, *C*H2CH=), 35.56, 36.78 (pyCH2CH2py), 47.28 (s, 1*J*Pt-C = 384 Hz, -CH=), 48.22 (s, 1*J*Pt-C = 380 Hz, -CH=), 49.28 (s, 3*J*Pt-C = 48 Hz, CH2py), 49.94 (s, 3*J*Pt-C = 38 Hz, CH2py), 117.74 (m, *para*-C, BArF4), 123.02, 123.31, 123.77, 123.83 (*meta*-C, py), 124.70 (quart, 1*J*C‑F = 272.7 Hz, CF3, BArF4), 125.44 (*meta*-C, py), 127.34 (*meta*-C, py), 128.92 (quart, 2*J*C-F = 31.7 Hz, *meta*-C, BArF4), 134.92 (br s, *ortho*-C, BArF4), 139.44, 139.68, 140.45 (*para*-C, py), 154.54, 155.56, 156.28, 157.03, 160.33, 161.50 (*ortho*-C, py), 161.92 (quart, 1*J*B-C = 50 Hz, B-C, BArF4)

References

( 1 ) Vedernikov, A.N.; Huffmann, J.C.; Caulton, K.G. *Inorg. Chem.*, *submitted*.

( 2 ) Scott, J.D.; Puddephatt, R.J. *Organometallics*. **1983**, *2*, 1643.

( 3) Parr, R.G.; Yang, W. Density-functional theory of atoms and molecules; Oxford university press: Oxford, 1989.

( 4) Perdew, J.P. ; Burke, K.; Ernzerhof, M. *Phys. Rev. Lett.* **1996**, *77*, 3865.

( 5) Ustynyuk, Yu.A.; Ustynyuk, L.Yu.; Laikov, D.N.; Lunin, V.V. *J. Organomet. Chem*. **2000**, *597*, 182.

( 6) Stevens, W.J.; Bash, H.; Krauss, M. *J. Chem. Phys*. **1984**, *81*, 6026; Stevens, W.J.; Bash, H.; Krauss, M.; Jasien, P. *Can. J. Chem*. **1992**, *70*, 612; Cundari, T.R.; Stevens, W.J. *J. Chem. Phys*. **1993**, *98*. 5555.
